# Supplementary material for: Varying oxygen coverage on Cu55 and its effect on CO oxidation
Source: Royal Society of Chemistry journal article supplement (doi:10.1039/c9cp00974d), 2019-01-01
Supplement: c9cp00974d1.pdf [file c9cp00974d1.pdf]

## Supplementary information

# Varying oxygen coverage on Cu<sub>55</sub> and its effect on CO oxidation

Li Ma<sup>1</sup> and Jaakko Akola<sup>1,2,a)</sup>

<sup>1</sup>Computational Physics Laboratory, Tampere University, P.O. Box 692, FI-33014 Tampere,  
Finland

<sup>2</sup>Department of Physics, Norwegian University of Science and Technology, NO-7491 Trondheim,  
Norway

---

<sup>a)</sup> Author to whom correspondence should be addressed. E-mail: jaakko.akola@ntnu.no

## Stepwise adsorption of O<sub>2</sub> molecules

There are twenty equivalent triangular fcc(111)-like facets in the icosahedral Cu<sub>55</sub> cluster (Figure S1). We began with the optimal Cu<sub>55</sub>O<sub>2</sub> configuration, which was obtained through considering the symmetrically inequivalent atop, bridge, and face binding sites, including different molecular orientations. The most stable adsorption is the bi-dentate mode as the first geometry in Fig. S2, which is the same with the structure in Ref. 1. Repeating this procedure with the next O<sub>2</sub> molecule on all vacant sites in the rest triangular faces step by step, we obtained the most stable configurations of Cu<sub>55</sub>O<sub>4</sub>, Cu<sub>55</sub>O<sub>6</sub> and so on. In total, more than 100 initial structures were considered to obtain the most favourable adsorption site for each O<sub>2</sub>. The type of adsorption is evident based on the O-O distance: In molecular adsorption, the O-O separation is between 1.45-1.65 Å, while in dissociative adsorption, the O atoms are separated by at least 2.90 Å.

In some cases, the relaxation process led to a spontaneous O<sub>2</sub> dissociation to atomic oxygen. The lowest-energy configurations of Cu<sub>55</sub>O<sub>2N</sub> complexes with the increasing number of dissociated O<sub>2</sub> molecules are given in Fig. S2. The full set of geometries for the stepwise adsorption of O<sub>2</sub> molecules for N = 1-20 are shown in Fig. S3. The complexes of this Approach 1 (see the main text) are labeled (O<sub>2</sub>)<sub>M</sub>(O)<sub>2D</sub> to indicate the number of O<sub>2</sub> units added to Cu<sub>55</sub> either molecularly (M) or dissociatively (D), where N = M + D. For N = 1-4, the most stable conformations are molecular adsorption with O<sub>2</sub> located on the neighboring triangular faces. However, the relaxation led to dissociation of O<sub>2</sub> with the increasing of O<sub>2</sub> molecules. The dissociative adsorption appears at N = 5 with one O<sub>2</sub> molecule dissociated to oxygen atoms (O<sub>2</sub>)<sub>4</sub>(O)<sub>2</sub>. As the O<sub>2</sub> units increase further, the dissociative adsorption prevails. The number of O<sub>2</sub> dissociation increases from two to seven at N = 7, 11, 12, 14, 15 and 16. For N = 17-20, the additional O<sub>2</sub> keeps molecular adsorption in the complex. There are common characteristics for the O<sub>2</sub> adsorption geometries. Dissociated O atoms preferentially occupy three-fold hollow sites and two-fold edge sites. By contrast, molecularly adsorbed O<sub>2</sub> units attach to bi-dentate sites and bridge sites. In the molecular adsorption, the bond lengths of O<sub>2</sub> significantly expand

from the gas-phase value of 1.23 Å to 1.45-1.65 Å. The lengths and bond orders of O<sub>2</sub> molecules indicate that the O-O bonds are activated in the adsorption process, not to mention the automatic dissociation to oxygen atoms in some cases (Fig. S2). A DFT-MD simulation was performed for ten O<sub>2</sub> molecules adsorbed on Cu<sub>55</sub> at room temperature (300 K). The obtained structure is in Fig. S4. Compared with the adsorption complex of Cu<sub>55</sub>(O<sub>2</sub>)<sub>8</sub>(O)<sub>4</sub> at 0 K, the number of dissociated O<sub>2</sub> molecules increases rapidly from two to nine at 300 K [Cu<sub>55</sub>(O<sub>2</sub>)(O)<sub>18</sub>] leaving only one O<sub>2</sub> intact. This confirms the spontaneous dissociation of O<sub>2</sub>.

The energies of  $E_a(N)$  and  $\langle E_a(N) \rangle$  versus the number of O<sub>2</sub> added on Cu<sub>55</sub> cluster are plotted for Approach 1 in Fig. S5. The corresponding energy values and the electronic and geometric properties are listed in Table S1. The trends in  $E_a(N)$  for the Cu<sub>55</sub>(O<sub>2</sub>)<sub>M</sub>(O)<sub>2D</sub> complexes (Fig. S5) clearly show that dissociative adsorption is preferred:  $E_a(N)$  is higher than 2.0 eV for the dissociative cases, while it keeps around 1.3 eV until Cu<sub>55</sub>(O<sub>2</sub>)<sub>9</sub>(O)<sub>8</sub> for molecular adsorption.  $E_a(N)$  decreases to less than 1.0 eV for  $N \geq 17$ . It should be noted that the adsorption energy of  $N = 20$  is -0.13 eV, which indicates that a saturated structure is achieved at  $N = 19$ . The second column of Fig. S5 shows the average adsorption energy  $\langle E_a(N) \rangle$  of the total O<sub>2</sub>. The  $\langle E_a(N) \rangle$  generally increases with the number of O<sub>2</sub> until  $N=16$ . Thus, the adsorption complexes can continue to gain energy during the adding process. The appearance of local peaks are consistent for  $E_a(N)$  and  $\langle E_a(N) \rangle$ , indicating spontaneous O<sub>2</sub> dissociation at these points.

As expected, oxygen adsorption leads to electron transfer from the Cu<sub>55</sub> to the oxygen, leaving the Cu<sub>55</sub> core with a net positive charge (Table S1). Moreover, the charge transfer increases with the number of oxygen except for  $N = 20$ , which is correlated with the interaction strength between Cu<sub>55</sub> and O<sub>2</sub>. The averaged effective charge is  $\sim 1.0 e$  on every dissociated O which is nearly two times higher than that of molecularly adsorbed O (Table S1). For Cu<sub>55</sub>, oxygen adsorption results in a clear increase in the average  $\langle \text{Cu-Cu} \rangle$  bond length. In comparison with 2.544 Å in the isolated Cu<sub>55</sub> cluster,

$\langle\text{Cu-Cu}\rangle$  increases from 2.547 to 2.662 Å as N increases from 1 to 20 (Table S1), which reflects the severe distortion of the  $\text{Cu}_{55}$  cluster geometry as oxygen adsorption proceeds.

## Reference

1. D Tang and J Zhang, *RSC Adv.*, 2013, **3**, 15225-15236.

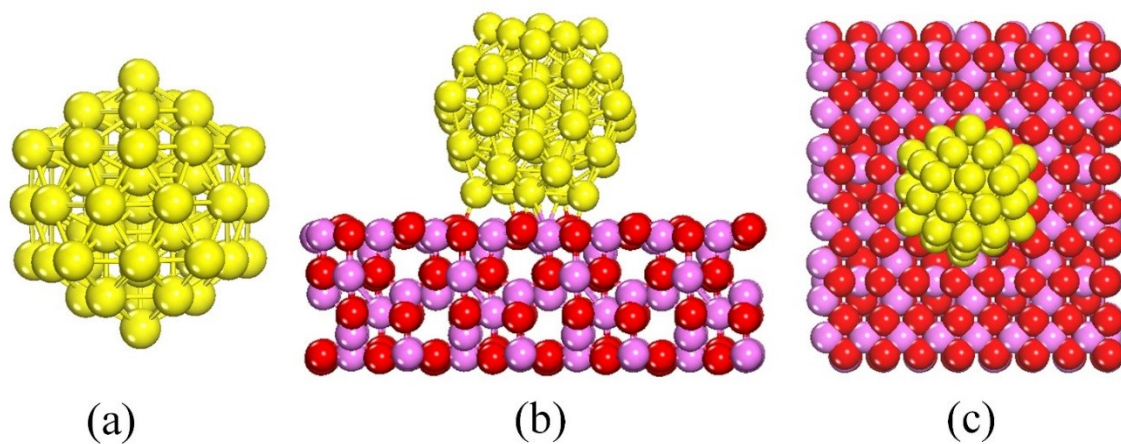

**Fig. S1** Optimized geometries of (a)  $\text{Cu}_{55}$ , (b) side view of  $\text{Cu}_{55}/\gamma\text{-Al}_2\text{O}_3(100)$  and (c) top view of  $\text{Cu}_{55}/\gamma\text{-Al}_2\text{O}_3(100)$ . Color key: Cu, yellow; Al, violet; O, red.

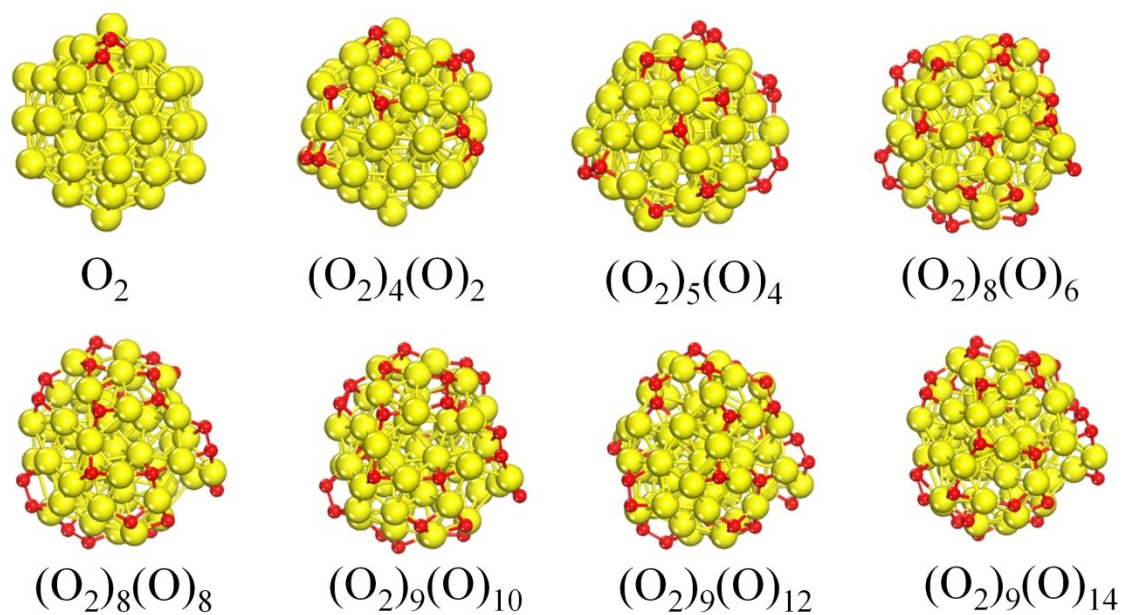

**Fig. S2** Geometries of  $Cu_{55}O_{2N}$  with the number of dissociated  $O_2$  increasing from zero to seven at  $N = 1, 5, 7, 11, 12, 14, 15, 16$  (Approach 1). The labeling  $(O_2)_M(O)_{2D}$  indicates the number of  $O_2$  units molecularly (M) and/or dissociatively (D) adsorbed.

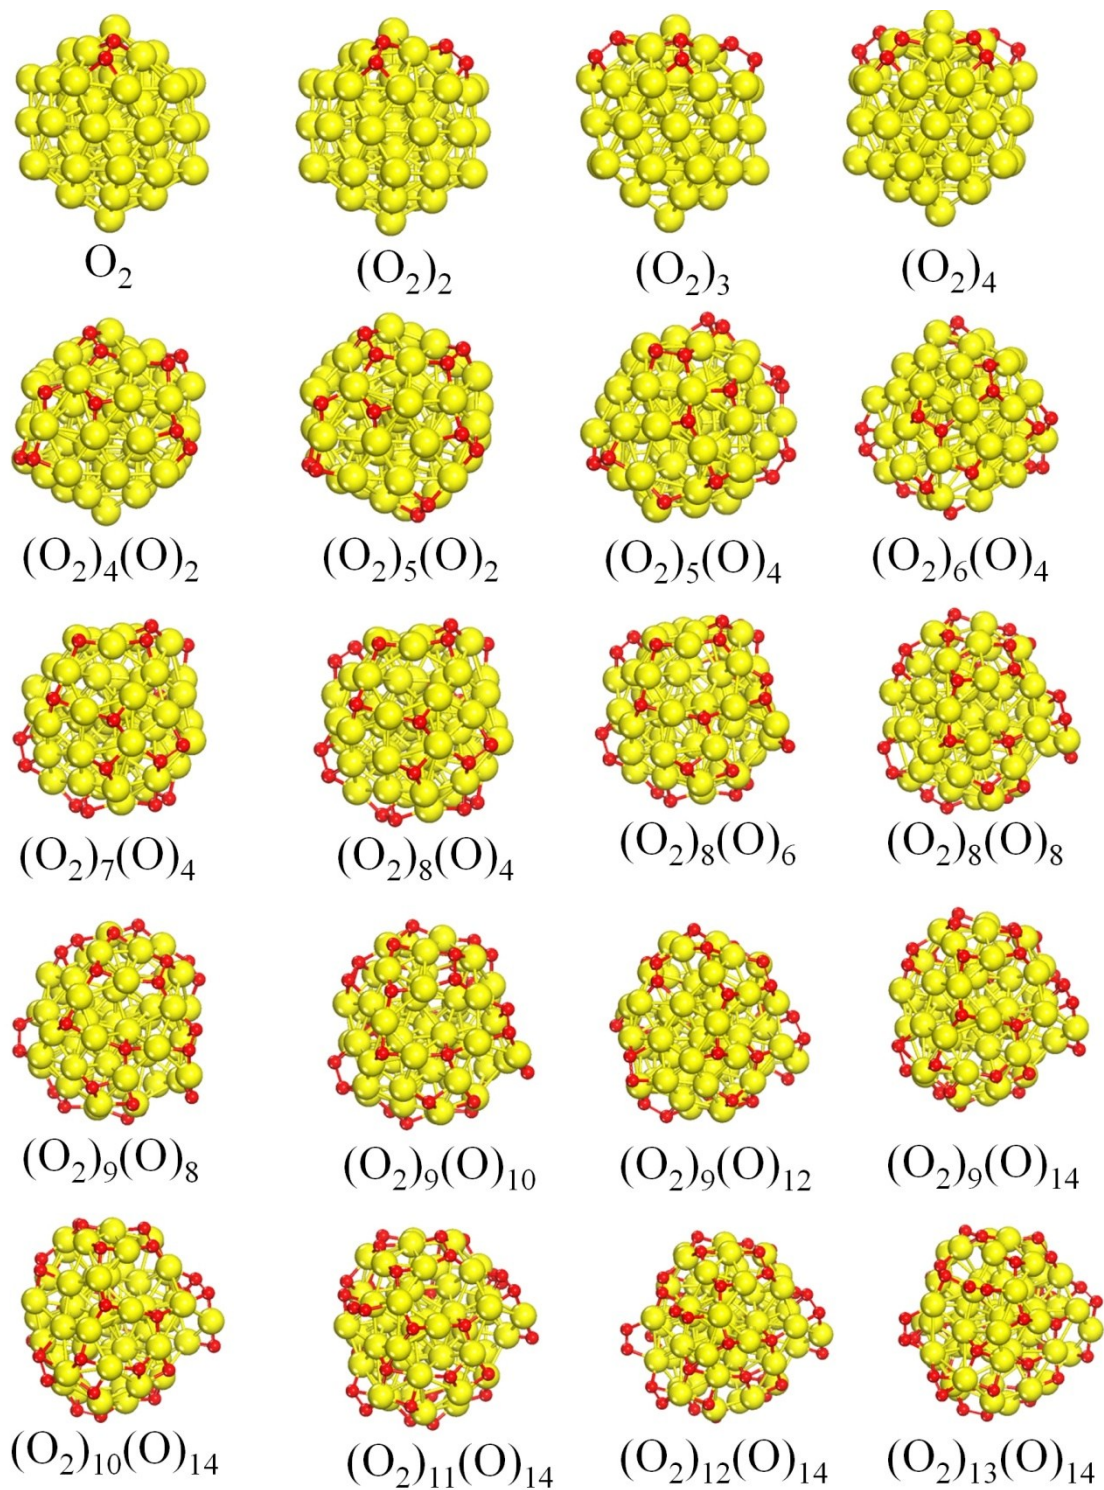

**Fig. S3** The full set of geometries for the stepwise adsorption of  $O_2$  molecules ( $N = 1-20$ ) on  $Cu_{55}$  (Approach 1).

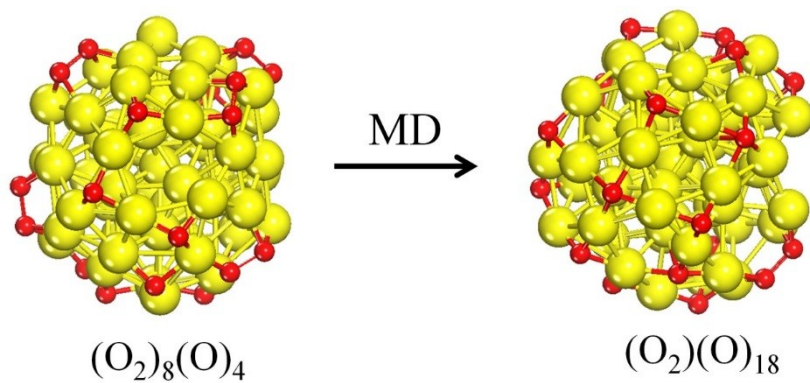

**Fig. S4** Geometries of  $Cu_5O_{2N}$  ( $N = 10$ ) at 0 K and after 20 ps of MD at 300 K. Most  $O_2$  dissociate already during this short simulation highlighting the instability of molecular oxygen.

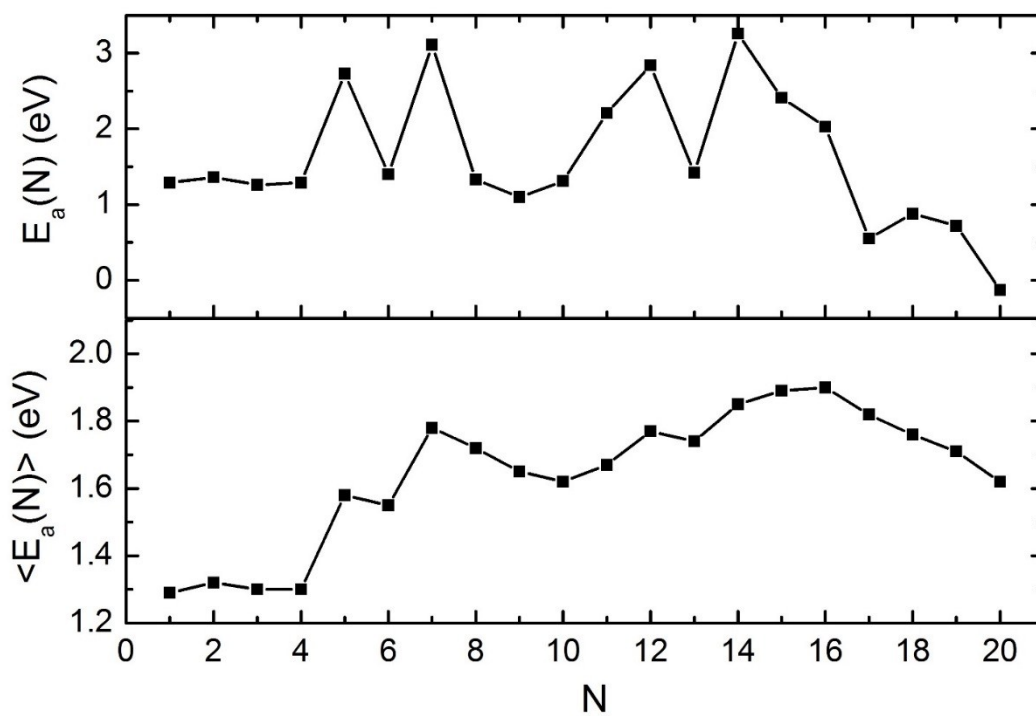

**Fig. S5** Adsorption energy  $E_a(N)$  of each  $O_2$  and average adsorption energy  $\langle E_a(N) \rangle$  of added  $O_2$  molecules versus the number of  $O_2$  added on  $Cu_{55}$  cluster (Approach 1). The spontaneous oxygen dissociation is visible as pronouncedly large values in  $E_a(N)$ . Note that this calculation is performed at 0 K and all  $O_2$  molecules are likely to dissociate under realistic conditions since they have small reaction barriers.



**Table S1** Properties of the stepwise O<sub>2</sub> adsorption complexes Cu<sub>55</sub>O<sub>2N</sub> (N=1-20, Approach 1).<sup>a</sup>

| N<br>(Cu <sub>55</sub> O <sub>2N</sub> ) | (O <sub>2</sub> ) <sub>M</sub> (O) <sub>2D</sub>  | $E_a(N)$<br>(eV) | $\langle E_a(N) \rangle$<br>(eV) | Q <sub>Cu55</sub><br>(e) | Q <sub>O</sub> (e)             |                   | $\langle \text{Cu-Cu} \rangle$<br>(Å) |
|------------------------------------------|---------------------------------------------------|------------------|----------------------------------|--------------------------|--------------------------------|-------------------|---------------------------------------|
|                                          |                                                   |                  |                                  |                          | (O <sub>2</sub> ) <sub>M</sub> | (O) <sub>2D</sub> |                                       |
| 1                                        | O <sub>2</sub>                                    | 1.29             | 1.29                             | 1.22                     | -0.61                          |                   | 2.547                                 |
| 2                                        | (O <sub>2</sub> ) <sub>2</sub>                    | 1.36             | 1.32                             | 2.40                     | -0.60                          |                   | 2.551                                 |
| 3                                        | (O <sub>2</sub> ) <sub>3</sub>                    | 1.26             | 1.30                             | 3.44                     | -0.57                          |                   | 2.559                                 |
| 4                                        | (O <sub>2</sub> ) <sub>4</sub>                    | 1.29             | 1.30                             | 4.65                     | -0.58                          |                   | 2.565                                 |
| 5                                        | (O <sub>2</sub> ) <sub>4</sub> (O) <sub>2</sub>   | 2.73             | 1.58                             | 6.54                     | -0.56                          | -1.01             | 2.565                                 |
| 6                                        | (O <sub>2</sub> ) <sub>5</sub> (O) <sub>2</sub>   | 1.40             | 1.55                             | 7.63                     | -0.56                          | -0.97             | 2.567                                 |
| 7                                        | (O <sub>2</sub> ) <sub>5</sub> (O) <sub>4</sub>   | 3.11             | 1.78                             | 9.60                     | -0.54                          | -1.04             | 2.574                                 |
| 8                                        | (O <sub>2</sub> ) <sub>6</sub> (O) <sub>4</sub>   | 1.33             | 1.72                             | 10.70                    | -0.58                          | -0.90             | 2.583                                 |
| 9                                        | (O <sub>2</sub> ) <sub>7</sub> (O) <sub>4</sub>   | 1.10             | 1.65                             | 12.09                    | -0.55                          | -1.09             | 2.584                                 |
| 10                                       | (O <sub>2</sub> ) <sub>8</sub> (O) <sub>4</sub>   | 1.31             | 1.62                             | 12.73                    | -0.55                          | -0.97             | 2.595                                 |
| 11                                       | (O <sub>2</sub> ) <sub>8</sub> (O) <sub>6</sub>   | 2.21             | 1.67                             | 15.04                    | -0.54                          | -1.04             | 2.597                                 |
| 12                                       | (O <sub>2</sub> ) <sub>8</sub> (O) <sub>8</sub>   | 2.84             | 1.77                             | 16.60                    | -0.56                          | -0.94             | 2.608                                 |
| 13                                       | (O <sub>2</sub> ) <sub>9</sub> (O) <sub>8</sub>   | 1.42             | 1.74                             | 18.29                    | -0.54                          | -1.05             | 2.611                                 |
| 14                                       | (O <sub>2</sub> ) <sub>9</sub> (O) <sub>10</sub>  | 3.26             | 1.85                             | 20.10                    | -0.54                          | -1.02             | 2.615                                 |
| 15                                       | (O <sub>2</sub> ) <sub>9</sub> (O) <sub>12</sub>  | 2.41             | 1.89                             | 21.14                    | -0.52                          | -0.97             | 2.635                                 |
| 16                                       | (O <sub>2</sub> ) <sub>9</sub> (O) <sub>14</sub>  | 2.03             | 1.90                             | 23.56                    | -0.56                          | -0.95             | 2.644                                 |
| 17                                       | (O <sub>2</sub> ) <sub>10</sub> (O) <sub>14</sub> | 0.55             | 1.82                             | 24.34                    | -0.54                          | -0.95             | 2.652                                 |
| 18                                       | (O <sub>2</sub> ) <sub>11</sub> (O) <sub>14</sub> | 0.88             | 1.76                             | 25.23                    | -0.52                          | -0.98             | 2.652                                 |
| 19                                       | (O <sub>2</sub> ) <sub>12</sub> (O) <sub>14</sub> | 0.72             | 1.71                             | 25.73                    | -0.50                          | -0.97             | 2.661                                 |
| 20                                       | (O <sub>2</sub> ) <sub>13</sub> (O) <sub>14</sub> | -0.13            | 1.62                             | 25.41                    | -0.45                          | -0.97             | 2.662                                 |

<sup>a</sup> $E_a(N)$  is the adsorption energy of the last molecular or dissociative adsorption on Cu<sub>55</sub>.  $\langle E_a(N) \rangle$  is the average adsorption energy of the added O<sub>2</sub> molecules. Q<sub>Cu55</sub> is the total charge on Cu<sub>55</sub> cluster. Q<sub>O</sub> are average charge on every molecular (O<sub>2</sub>)<sub>M</sub> and dissociative (O)<sub>2D</sub> adsorption O atom, respectively.  $\langle \text{Cu-Cu} \rangle$  is the average Cu-Cu bond length in the cluster.

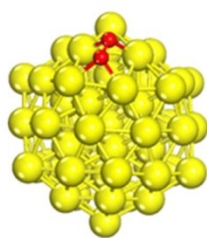

$O_2$

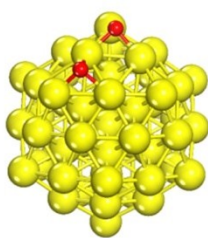

$(O)_2$

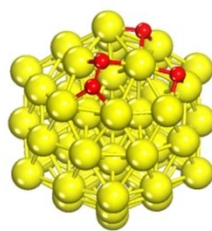

$O_2(O)_2$

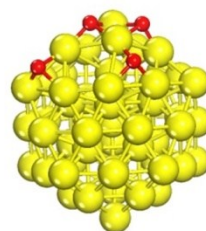

$(O)_4$

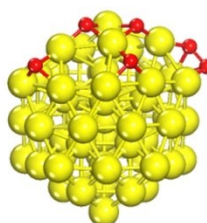

$O_2(O)_4$

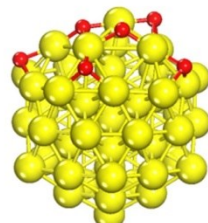

$(O)_6$

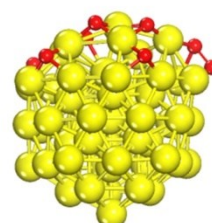

$O_2(O)_6$

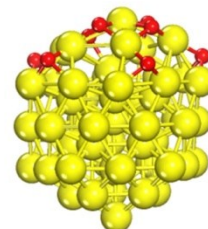

$(O)_8$

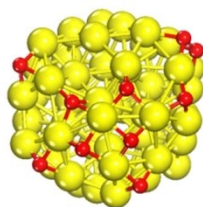

$O_2(O)_8$

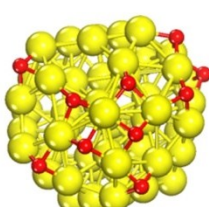

$(O)_{10}$

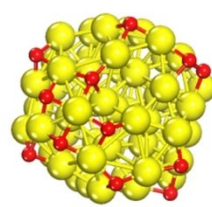

$O_2(O)_{10}$

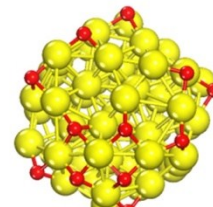

$(O)_{12}$

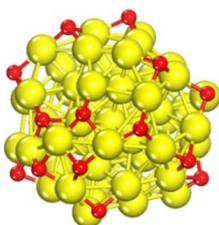

$O_2(O)_{12}$

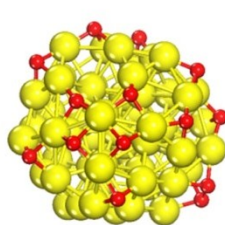

$(O)_{14}$

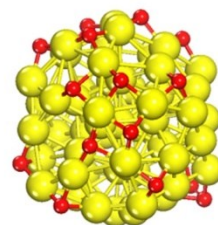

$O_2(O)_{14}$

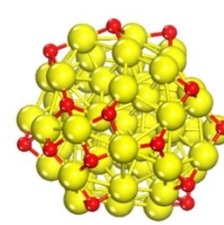

$(O)_{16}$

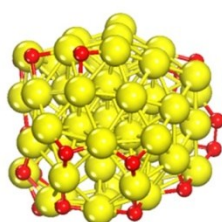

$O_2(O)_{16}$

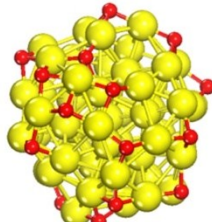

$(O)_{18}$

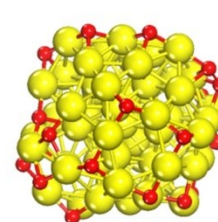

$O_2(O)_{18}$

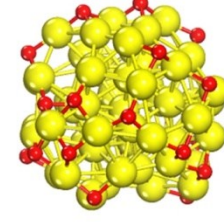

$(O)_{20}$

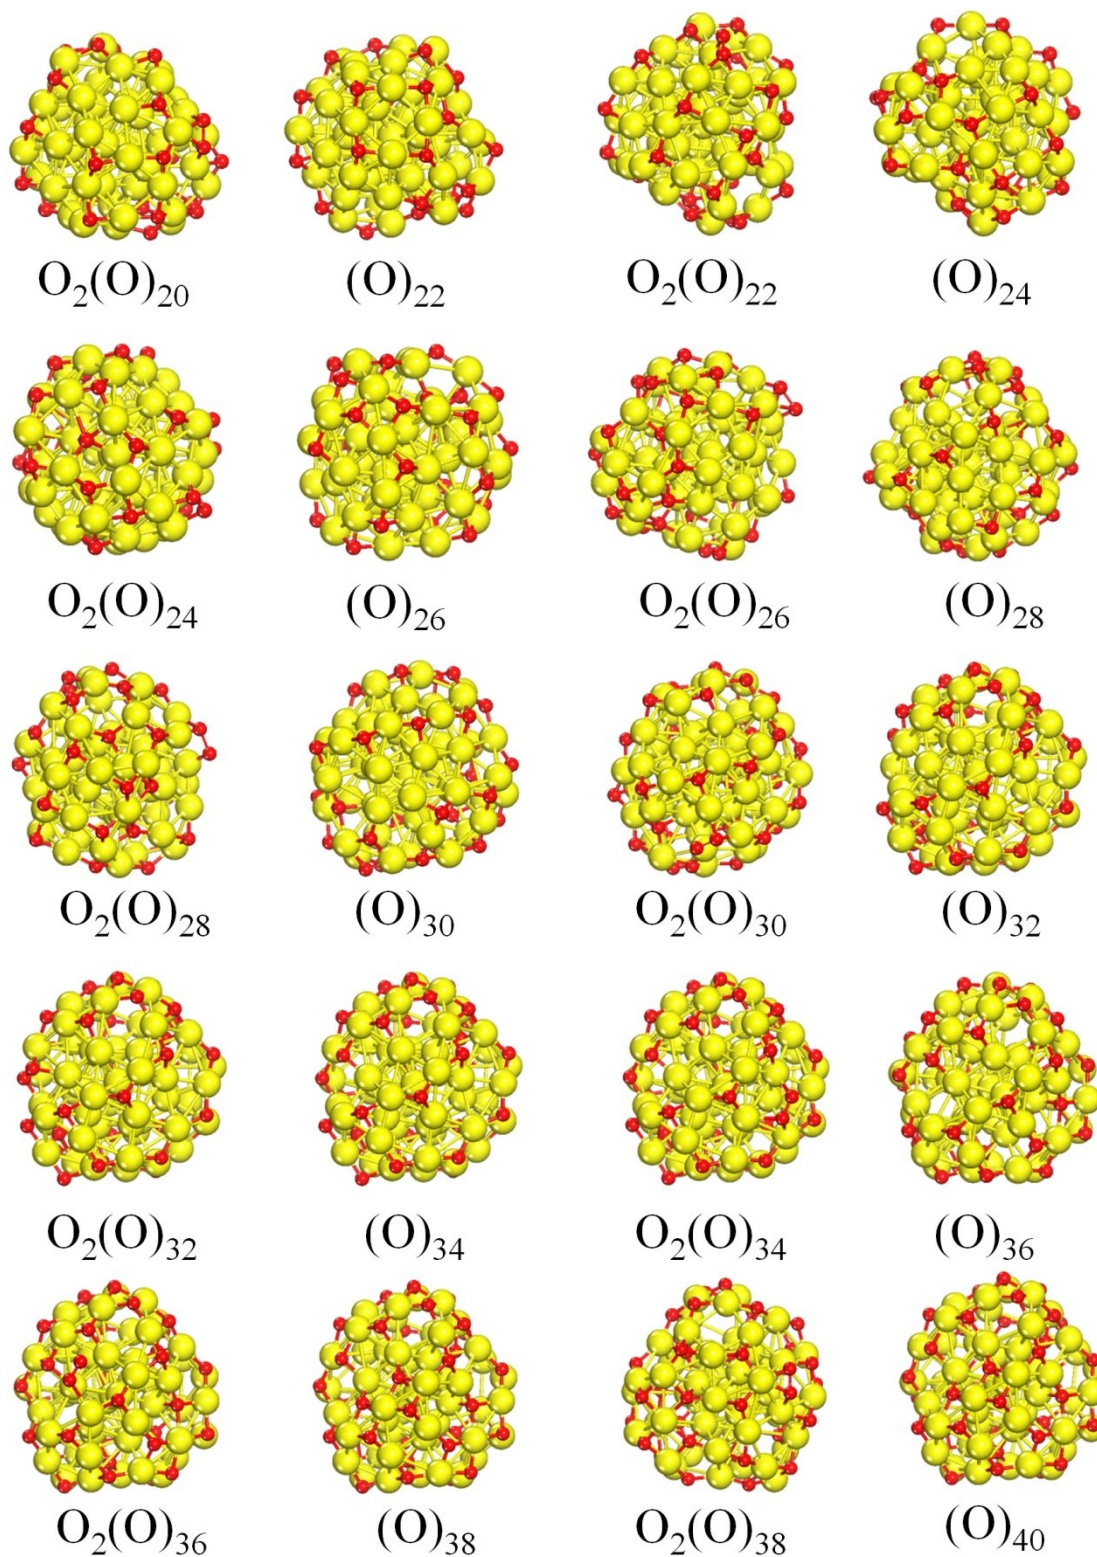

**Fig. S6** The full set of geometries for stepwise adsorption and dissociation of  $O_2$  molecules ( $N = 1-20$ ) on  $Cu_{55}$  (Approach 2).

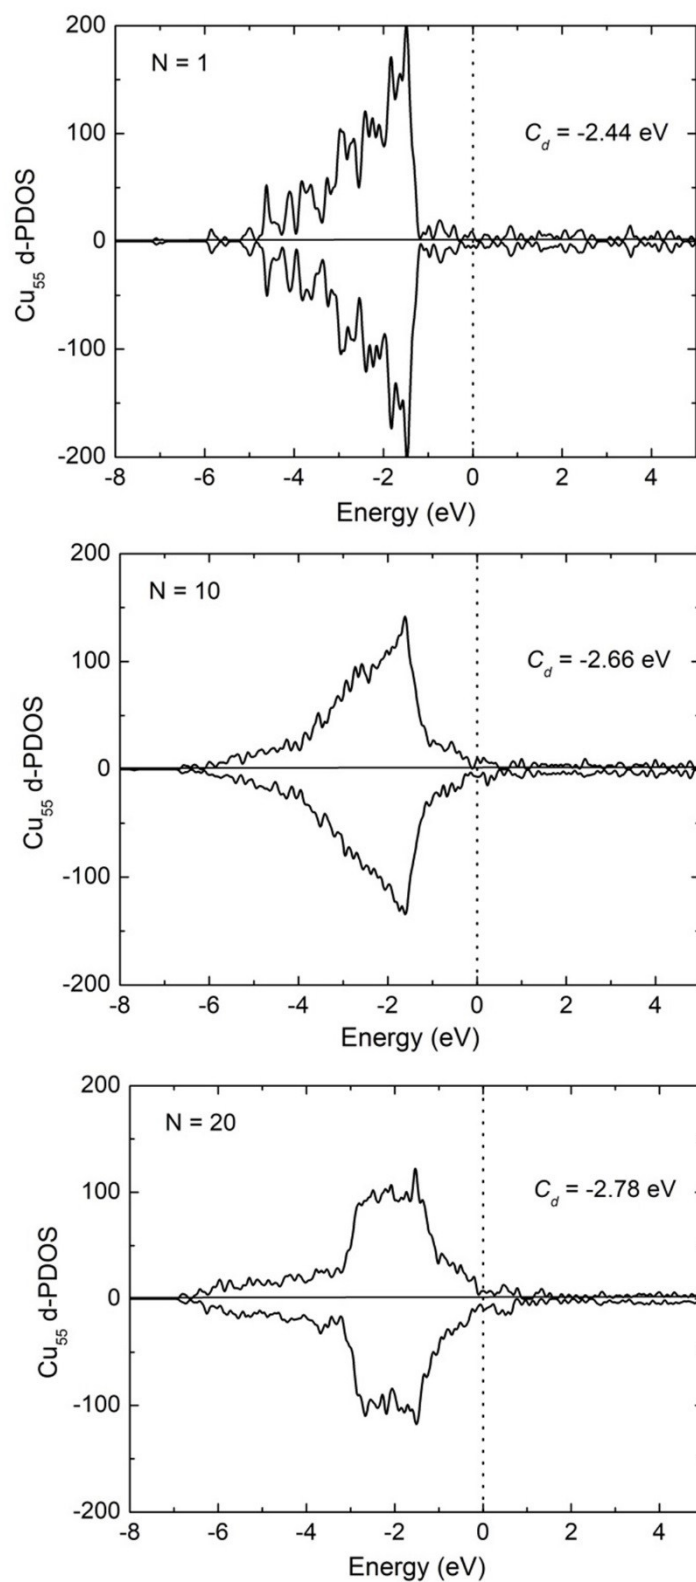

**Fig. S7** Spin-polarized  $\text{Cu}_{55}$  d-projected density of states (d-PDOS) with  $(\text{O})_{2N}$  ( $N = 1, 10,$  and  $20$ ) coverage. The dotted line represents Fermi level at 0.

**Table S2** Properties of the stepwise O<sub>2</sub> adsorption and dissociation complexes Cu<sub>55</sub>O<sub>2N</sub> (N=1-20, Approach 2).

| N<br>(Cu <sub>55</sub> O <sub>2N</sub> ) | (O <sub>2</sub> ) <sub>M</sub> (O) <sub>2D</sub> | $E_a(N)$<br>(eV) | $\langle E_a(N) \rangle$<br>(eV) | Q <sub>Cu55</sub><br>(e) | Q <sub>O</sub> (e)             |                   | $\langle \text{Cu-Cu} \rangle$<br>(Å) |
|------------------------------------------|--------------------------------------------------|------------------|----------------------------------|--------------------------|--------------------------------|-------------------|---------------------------------------|
|                                          |                                                  |                  |                                  |                          | (O <sub>2</sub> ) <sub>M</sub> | (O) <sub>2D</sub> |                                       |
| 1                                        | O <sub>2</sub>                                   | 1.29             | 1.29                             | 1.22                     | -0.61                          |                   | 2.547                                 |
|                                          | (O) <sub>2</sub>                                 | 3.41             | 3.41                             | 1.93                     |                                | -0.96             | 2.550                                 |
| 2                                        | O <sub>2</sub> (O) <sub>2</sub>                  | 1.01             | 2.21                             | 2.99                     | -0.53                          | -0.96             | 2.548                                 |
|                                          | (O) <sub>4</sub>                                 | 2.66             | 3.03                             | 4.01                     |                                | -1.00             | 2.553                                 |
| 3                                        | O <sub>2</sub> (O) <sub>4</sub>                  | 0.86             | 2.31                             | 5.15                     | -0.53                          | -1.02             | 2.557                                 |
|                                          | (O) <sub>6</sub>                                 | 2.94             | 3.00                             | 5.70                     |                                | -0.95             | 2.561                                 |
| 4                                        | O <sub>2</sub> (O) <sub>6</sub>                  | 1.16             | 2.56                             | 6.87                     | -0.57                          | -0.95             | 2.566                                 |
|                                          | (O) <sub>8</sub>                                 | 3.31             | 3.08                             | 8.24                     |                                | -1.03             | 2.567                                 |
| 5                                        | O <sub>2</sub> (O) <sub>8</sub>                  | 0.81             | 2.63                             | 8.97                     | -0.64                          | -0.96             | 2.569                                 |
|                                          | (O) <sub>10</sub>                                | 3.19             | 3.10                             | 9.29                     |                                | -0.92             | 2.574                                 |
| 6                                        | O <sub>2</sub> (O) <sub>10</sub>                 | 1.37             | 2.81                             | 10.95                    | -0.63                          | -0.96             | 2.574                                 |
|                                          | (O) <sub>12</sub>                                | 3.60             | 3.19                             | 11.74                    |                                | -0.97             | 2.581                                 |
| 7                                        | O <sub>2</sub> (O) <sub>12</sub>                 | 0.98             | 2.87                             | 12.32                    | -0.57                          | -0.93             | 2.582                                 |
|                                          | (O) <sub>14</sub>                                | 3.06             | 3.17                             | 13.34                    |                                | -0.95             | 2.597                                 |
| 8                                        | O <sub>2</sub> (O) <sub>14</sub>                 | 1.20             | 2.92                             | 14.27                    | -0.58                          | -0.93             | 2.603                                 |
|                                          | (O) <sub>16</sub>                                | 2.95             | 3.14                             | 15.38                    |                                | -0.96             | 2.609                                 |
| 9                                        | O <sub>2</sub> (O) <sub>16</sub>                 | 1.27             | 2.93                             | 16.69                    | -0.51                          | -0.97             | 2.611                                 |
|                                          | (O) <sub>18</sub>                                | 2.57             | 3.08                             | 17.12                    |                                | -0.95             | 2.613                                 |
| 10                                       | O <sub>2</sub> (O) <sub>18</sub>                 | 1.08             | 2.88                             | 18.20                    | -0.50                          | -0.95             | 2.615                                 |
|                                          | (O) <sub>20</sub>                                | 3.04             | 3.07                             | 18.66                    |                                | -0.93             | 2.618                                 |
| 11                                       | O <sub>2</sub> (O) <sub>20</sub>                 | 0.77             | 2.86                             | 20.88                    | -0.47                          | -0.99             | 2.623                                 |
|                                          | (O) <sub>22</sub>                                | 2.81             | 3.05                             | 21.84                    |                                | -0.99             | 2.628                                 |
| 12                                       | O <sub>2</sub> (O) <sub>22</sub>                 | 0.69             | 2.80                             | 22.09                    | -0.37                          | -0.96             | 2.627                                 |
|                                          | (O) <sub>24</sub>                                | 2.63             | 3.01                             | 23.22                    |                                | -0.96             | 2.632                                 |
| 13                                       | O <sub>2</sub> (O) <sub>24</sub>                 | 1.41             | 2.89                             | 24.94                    | -0.51                          | -0.99             | 2.638                                 |
|                                          | (O) <sub>26</sub>                                | 2.88             | 3.00                             | 25.00                    |                                | -0.96             | 2.639                                 |
| 14                                       | O <sub>2</sub> (O) <sub>26</sub>                 | 0.71             | 2.84                             | 26.57                    | -0.48                          | -0.98             | 2.637                                 |
|                                          | (O) <sub>28</sub>                                | 2.68             | 2.98                             | 26.63                    |                                | -0.95             | 2.648                                 |
| 15                                       | O <sub>2</sub> (O) <sub>28</sub>                 | 0.88             | 2.84                             | 27.56                    | -0.49                          | -0.94             | 2.652                                 |
|                                          | (O) <sub>30</sub>                                | 3.12             | 2.99                             | 27.91                    |                                | -0.93             | 2.655                                 |
| 16                                       | O <sub>2</sub> (O) <sub>30</sub>                 | 1.01             | 2.87                             | 29.22                    | -0.49                          | -0.94             | 2.675                                 |
|                                          | (O) <sub>32</sub>                                | 2.79             | 2.98                             | 30.15                    |                                | -0.94             | 2.677                                 |
| 17                                       | O <sub>2</sub> (O) <sub>32</sub>                 | 0.66             | 2.84                             | 31.16                    | -0.36                          | -0.95             | 2.683                                 |
|                                          | (O) <sub>34</sub>                                | 1.67             | 2.90                             | 32.34                    |                                | -0.95             | 2.684                                 |
| 18                                       | O <sub>2</sub> (O) <sub>34</sub>                 | 0.68             | 2.74                             | 32.77                    | -0.34                          | -0.94             | 2.689                                 |
|                                          | (O) <sub>36</sub>                                | 1.69             | 2.88                             | 33.50                    |                                | -0.93             | 2.696                                 |
| 19                                       | O <sub>2</sub> (O) <sub>36</sub>                 | 0.39             | 2.75                             | 33.18                    | -0.21                          | -0.91             | 2.692                                 |
|                                          | (O) <sub>38</sub>                                | 1.61             | 2.82                             | 34.76                    |                                | -0.91             | 2.697                                 |
| 20                                       | O <sub>2</sub> (O) <sub>38</sub>                 | 0.54             | 2.70                             | 36.09                    | -0.34                          | -0.88             | 2.705                                 |
|                                          | (O) <sub>40</sub>                                | 1.65             | 2.77                             | 37.39                    |                                | -0.93             | 2.707                                 |

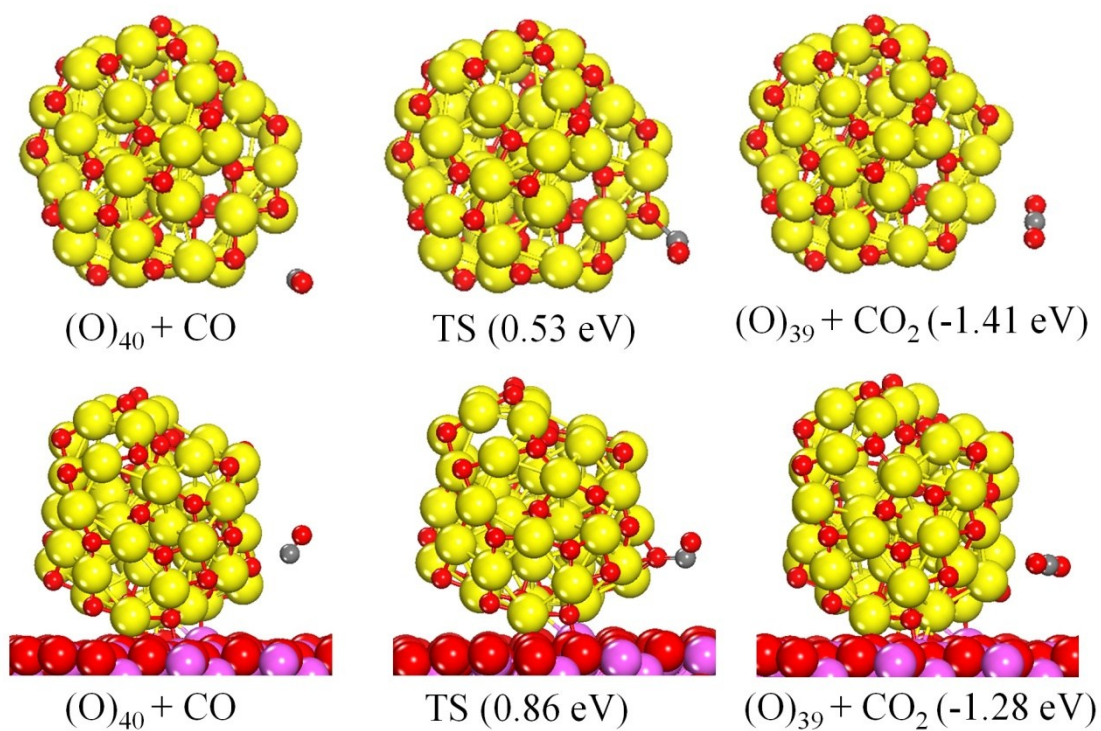

**Fig. S8** Structures of the initial state (IS), transition state (TS), and final state (FS) for the catalytic CO oxidation on Cu<sub>55</sub>(O)<sub>40</sub> and Cu<sub>55</sub>(O)<sub>40</sub>/γ-Al<sub>2</sub>O<sub>3</sub>(100) by the Eley–Rideal (ER) mechanism and the energy changes with respect to the IS.
